# Supplementary material for: Synthesis, characterization, and thermoelectric properties of superconducting (BEDT-TTF)2I3nanoparticles
Source: Royal Society of Chemistry journal article supplement (doi:10.1039/c6tc01378c), 2016-01-01

## Supplementary Information

### Synthesis, characterization, and thermoelectric properties of superconducting (BEDT-TTF)<sub>2</sub>I<sub>3</sub> nanoparticles

I. Chtioui-Gay,<sup>a,b</sup> C. Faulmann,<sup>\*a,b</sup> D. de Caro,<sup>\*a,b</sup> K. Jacob,<sup>a,b</sup> L. Valade,<sup>a,b</sup> P. de Caro,<sup>c</sup> J. Fraxedas,<sup>d</sup> B. Ballesteros,<sup>d</sup> E. Steven,<sup>e</sup> E. S. Choi,<sup>e</sup> M. Lee,<sup>e</sup> S. M. Benjamin,<sup>e</sup> E. Yvenou,<sup>f</sup> J.-P. Simonato,<sup>f</sup> and A. Carella.<sup>f</sup>

<sup>a</sup> CNRS, LCC (Laboratoire de Chimie de Coordination), 205 route de Narbonne, BP 44099, 31077 Toulouse Cedex 4, France.

E-mail: [dominique.decaro@lcc-toulouse.fr](mailto:dominique.decaro@lcc-toulouse.fr); [christophe.faulmann@lcc-toulouse.fr](mailto:christophe.faulmann@lcc-toulouse.fr).

<sup>b</sup> Université de Toulouse, UPS, INPT, 31077 Toulouse Cedex 4, France.

<sup>c</sup> Laboratoire de Chimie Agro-industrielle (LCA), Université de Toulouse, INRA, INPT, Toulouse, France.

<sup>d</sup> Catalan Institute of Nanoscience and Nanotechnology (ICN2), CSIC and The Barcelona Institute of Science and Technology, Campus UAB, Bellaterra, 08193 Barcelona, Spain.

<sup>e</sup> National High Magnetic Field Laboratory, 1800 E. Paul Dirac Drive, 32310 Tallahassee, Florida, USA.

<sup>f</sup> Université Grenoble Alpes, CEA/LITEN/DTNM, MINATEC Campus, F-38054 Grenoble, France.

### XRD assignments for (BEDT-TTF)<sub>2</sub>I<sub>3</sub> nanoparticles (*obs*: NPs; *calc*: single crystal)

| No. | h | k  | l  | 2θ (calc) [°] | 2θ (obs) [°] | 2θ (diff) [°] | d-sp. (calc) [Å] | d-sp. (obs) [Å] | d-sp. (diff) [Å] |
|-----|---|----|----|---------------|--------------|---------------|------------------|-----------------|------------------|
| 1   | 0 | 0  | 1  | 5,8513        | 5,8213       | 0,0301        | 15,091980        | 15,169830       | -0,077853        |
| 2   | 0 | 1  | -1 | 11,3259       | 11,3853      | -0,0594       | 7,806358         | 7,765741        | 0,040617         |
| 3   | 0 | 0  | 2  | 11,7180       | 11,7494      | -0,0314       | 7,545990         | 7,525892        | 0,020098         |
| 4   | 0 | 1  | 1  | 12,5513       | 12,5543      | -0,0030       | 7,046807         | 7,045113        | 0,001695         |
| 5   | 0 | 1  | -2 | 14,7361       | 14,6488      | 0,0873        | 6,006573         | 6,042185        | -0,035612        |
| 6   | 1 | 0  | -1 | 14,7804       | 14,8307      | -0,0503       | 5,988656         | 5,968466        | 0,020190         |
| 7   | 1 | -1 | -1 | 15,4098       | 15,4426      | -0,0328       | 5,745470         | 5,733345        | 0,012125         |
| 8   | 1 | -1 | 1  | 15,9053       | 15,9372      | -0,0319       | 5,567558         | 5,556479        | 0,011079         |
| 9   | 1 | 0  | 1  | 16,2291       | 16,0900      | 0,1391        | 5,457213         | 5,504070        | -0,046856        |
| 10  | 1 | 0  | -2 | 17,3196       | 17,4260      | -0,1064       | 5,115986         | 5,084981        | 0,031005         |
| 11  | 0 | 0  | 3  | 17,6157       | 17,6386      | -0,0230       | 5,030660         | 5,024158        | 0,006502         |
| 12  | 1 | -1 | -2 | 18,2706       | 18,3282      | -0,0576       | 4,851781         | 4,836667        | 0,015114         |
| 13  | 1 | -1 | 2  | 19,1054       | 19,1526      | -0,0472       | 4,641621         | 4,630288        | 0,011332         |
| 14  | 0 | 1  | -3 | 19,3921       | 19,3004      | 0,0917        | 4,573648         | 4,595175        | -0,021526        |
| 15  | 1 | 0  | 2  | 19,7558       | 19,5888      | 0,1670        | 4,490262         | 4,528158        | -0,037896        |
| 16  | 1 | 1  | -1 | 20,4759       | 20,3190      | 0,1569        | 4,333936         | 4,367038        | -0,0331          |
| 17  | 1 | 1  | 0  | 20,5382       | 20,6920      | -0,1537       | 4,320920         | 4,289160        | 0,031760         |
| 18  | 0 | 2  | 0  | 20,9173       | 20,9526      | -0,0354       | 4,243474         | 4,236389        | 0,007085         |
| 19  | 1 | -2 | 1  | 21,5140       | 21,4234      | 0,0905        | 4,127107         | 4,144343        | -0,017236        |
| 20  | 0 | 1  | 3  | 21,5658       | 21,6926      | -0,1267       | 4,117298         | 4,093532        | 0,023767         |
| 21  | 1 | 1  | -2 | 22,0617       | 21,9721      | 0,0896        | 4,025872         | 4,042087        | -0,016215        |
| 22  | 1 | -1 | -3 | 22,3764       | 22,3805      | -0,0041       | 3,969944         | 3,969234        | 0,000710         |
| 23  | 0 | 2  | 1  | 22,4126       | 22,5451      | -0,1326       | 3,963627         | 3,940617        | 0,023010         |
| 24  | 0 | 2  | -2 | 22,7643       | 22,8339      | -0,0696       | 3,903179         | 3,891441        | 0,011738         |
| 25  | 1 | -1 | 3  | 23,4079       | 23,4552      | -0,0473       | 3,797291         | 3,789747        | 0,007544         |
| 26  | 0 | 0  | 4  | 23,5608       | 23,5924      | -0,0316       | 3,772995         | 3,768020        | 0,004975         |
| 27  | 1 | -2 | 2  | 23,6886       | 23,7030      | -0,0144       | 3,752927         | 3,750682        | 0,00224          |
| 28  | 1 | -2 | -2 | 24,2778       | 24,3906      | -0,1128       | 3,663161         | 3,646474        | 0,016688         |
| 29  | 1 | 1  | -3 | 24,9983       | 24,8418      | 0,1565        | 3,559196         | 3,581256        | -0,022060        |
| 30  | 1 | 1  | 2  | 25,2555       | 25,2418      | 0,0137        | 3,523533         | 3,525409        | -0,001876        |
| 31  | 0 | 2  | 2  | 25,2564       | 25,3571      | -0,1007       | 3,523404         | 3,509642        | 0,013762         |

|    |   |    |    |         |         |         |          |          |           |
|----|---|----|----|---------|---------|---------|----------|----------|-----------|
| 32 | 1 | 0  | -4 | 25,9868 | 25,9381 | 0,0487  | 3,426006 | 3,432329 | -0,006323 |
| 33 | 2 | -1 | 0  | 27,1085 | 27,0989 | 0,0096  | 3,286734 | 3,287882 | -0,001148 |
| 34 | 1 | -1 | -4 | 27,2023 | 27,2130 | -0,0107 | 3,275618 | 3,274354 | 0,001263  |
| 35 | 1 | -2 | -3 | 27,8141 | 27,9397 | -0,1257 | 3,204942 | 3,190811 | 0,01413   |
| 36 | 1 | -1 | 4  | 28,3503 | 28,3637 | -0,0135 | 3,145533 | 3,144069 | 0,00146   |
| 37 | 2 | -1 | -2 | 28,5504 | 28,4600 | 0,0904  | 3,123936 | 3,133652 | -0,0097   |
| 38 | 2 | 0  | 0  | 28,9591 | 28,9566 | 0,0025  | 3,080776 | 3,081031 | -0,000255 |
| 39 | 2 | -2 | 0  | 29,2644 | 29,2473 | 0,0171  | 3,049318 | 3,051063 | -0,001745 |
| 40 | 0 | 0  | 5  | 29,5710 | 29,5393 | 0,0318  | 3,018396 | 3,021568 | -0,0031   |
| 41 | 0 | 2  | -4 | 29,7232 | 29,7103 | 0,0130  | 3,003286 | 3,004569 | -0,001283 |
| 42 | 1 | 2  | -2 | 30,0087 | 30,0272 | -0,0185 | 2,975365 | 2,973573 | 0,001793  |
| 43 | 0 | 1  | -5 | 30,1938 | 30,1755 | 0,0183  | 2,957546 | 2,959298 | -0,001753 |
| 44 | 1 | 2  | 1  | 30,8883 | 30,8574 | 0,0310  | 2,892609 | 2,895440 | -0,002831 |
| 45 | 2 | -1 | -3 | 31,0306 | 30,9737 | 0,0569  | 2,879671 | 2,884827 | -0,005156 |
| 46 | 1 | 0  | -5 | 31,1980 | 31,1919 | 0,0061  | 2,864598 | 2,865143 | -0,000545 |
| 47 | 1 | -3 | 2  | 31,3929 | 31,4015 | -0,0086 | 2,847257 | 2,846500 | 0,00075   |
| 48 | 2 | -2 | 2  | 32,1279 | 32,2301 | -0,1023 | 2,783779 | 2,775180 | 0,00859   |
| 49 | 2 | 0  | 2  | 32,7956 | 32,7562 | 0,0394  | 2,728606 | 2,731799 | -0,003192 |
| 50 | 0 | 3  | 1  | 32,8735 | 32,9087 | -0,0352 | 2,722325 | 2,719493 | 0,002832  |
| 51 | 1 | 1  | -5 | 33,4736 | 33,5212 | -0,0476 | 2,674873 | 2,671185 | 0,003688  |
| 52 | 1 | -3 | 3  | 33,8168 | 33,7832 | 0,0336  | 2,648511 | 2,651067 | -0,002557 |
| 53 | 2 | 1  | -1 | 33,8400 | 33,8668 | -0,0267 | 2,646744 | 2,644717 | 0,002027  |
| 54 | 2 | -1 | 3  | 33,9409 | 33,9780 | -0,0371 | 2,639108 | 2,636311 | 0,002798  |
| 55 | 0 | 2  | -5 | 34,3138 | 34,3514 | -0,0376 | 2,611279 | 2,608508 | 0,002771  |
| 56 | 2 | 1  | -2 | 34,5193 | 34,5338 | -0,0145 | 2,596202 | 2,595147 | 0,001056  |
| 57 | 2 | -3 | -1 | 35,2580 | 35,2291 | 0,0289  | 2,543480 | 2,545498 | -0,002018 |
| 58 | 2 | 1  | 1  | 35,6439 | 35,4770 | 0,1669  | 2,516821 | 2,528280 | -0,011459 |
| 59 | 1 | -3 | -3 | 35,7790 | 35,7567 | 0,0223  | 2,507632 | 2,509142 | -0,00151  |
| 60 | 2 | 0  | 3  | 36,1186 | 36,1584 | -0,0397 | 2,484824 | 2,482184 | 0,002640  |
| 61 | 2 | -3 | 2  | 36,8160 | 36,8882 | -0,0721 | 2,439340 | 2,434735 | 0,004605  |
| 62 | 0 | 3  | -4 | 37,3542 | 37,3256 | 0,0286  | 2,405425 | 2,407200 | -0,001775 |
| 63 | 1 | -1 | -6 | 38,0449 | 38,0841 | -0,0392 | 2,363326 | 2,360980 | 0,002345  |
| 64 | 0 | 3  | 3  | 38,2870 | 38,1809 | 0,1061  | 2,348936 | 2,355219 | -0,006283 |
| 65 | 0 | 2  | 5  | 38,5817 | 38,6586 | -0,0769 | 2,331671 | 2,327209 | 0,004463  |
| 66 | 1 | 3  | -1 | 38,9420 | 38,9858 | -0,0438 | 2,310922 | 2,308428 | 0,002494  |
| 67 | 0 | 2  | -6 | 39,3692 | 39,3729 | -0,0037 | 2,286824 | 2,286618 | 0,000206  |
| 68 | 1 | 3  | -2 | 39,4511 | 39,4603 | -0,0092 | 2,282268 | 2,281755 | 0,000512  |
| 69 | 1 | 0  | 6  | 40,4566 | 40,5123 | -0,0558 | 2,227833 | 2,224895 | 0,002938  |
| 70 | 3 | -1 | -1 | 41,2017 | 41,2246 | -0,0229 | 2,189248 | 2,188083 | 0,001165  |
| 71 | 2 | 2  | -1 | 41,2599 | 41,3289 | -0,0690 | 2,186292 | 2,182802 | 0,003490  |
| 72 | 3 | -2 | 0  | 41,6054 | 41,5900 | 0,0155  | 2,168932 | 2,169703 | -0,000771 |
| 73 | 0 | 0  | 7  | 41,8667 | 41,8465 | 0,0203  | 2,155997 | 2,156994 | -0,000997 |
| 74 | 0 | 1  | -7 | 41,9517 | 41,9804 | -0,0287 | 2,151826 | 2,150420 | 0,001406  |
| 75 | 2 | -3 | -4 | 42,3729 | 42,3412 | 0,0317  | 2,131405 | 2,132929 | -0,001524 |
| 76 | 0 | 4  | 0  | 42,5754 | 42,6126 | -0,0373 | 2,121737 | 2,119968 | 0,001769  |
| 77 | 2 | -4 | 1  | 42,7052 | 42,7116 | -0,0064 | 2,115589 | 2,115286 | 0,00030   |
| 78 | 2 | -4 | -1 | 43,0571 | 43,0035 | 0,0536  | 2,099107 | 2,101601 | -0,002494 |
| 79 | 2 | 0  | -6 | 43,2853 | 43,2787 | 0,0066  | 2,088571 | 2,088873 | -0,000302 |
| 80 | 3 | 0  | -1 | 43,6474 | 43,5620 | 0,0854  | 2,072077 | 2,075942 | -0,003864 |
| 81 | 1 | -3 | -5 | 43,8298 | 43,8231 | 0,0066  | 2,063880 | 2,064175 | -0,0002   |
| 82 | 0 | 1  | 7  | 44,5418 | 44,5822 | -0,0403 | 2,032523 | 2,030779 | 0,001744  |
| 83 | 1 | -4 | 4  | 45,0125 | 45,0223 | -0,0098 | 2,012359 | 2,011945 | 0,000414  |
| 84 | 1 | -1 | 7  | 45,2010 | 45,1959 | 0,0050  | 2,004405 | 2,004617 | -0,000212 |
| 85 | 2 | 2  | 2  | 45,3683 | 45,3512 | 0,0171  | 1,997398 | 1,998111 | -0,000713 |
| 86 | 1 | 2  | 5  | 45,4195 | 45,4748 | -0,0552 | 1,995266 | 1,992971 | 0,002295  |
| 87 | 1 | -3 | 6  | 45,5797 | 45,5862 | -0,0065 | 1,988628 | 1,988360 | 0,000268  |
| 88 | 2 | -4 | 3  | 45,7851 | 45,8107 | -0,0256 | 1,980182 | 1,979136 | 0,001046  |

|     |   |    |    |         |         |         |          |          |           |
|-----|---|----|----|---------|---------|---------|----------|----------|-----------|
| 89  | 1 | 3  | 3  | 45,8900 | 45,9384 | -0,0484 | 1,975899 | 1,973931 | 0,00196   |
| 90  | 1 | 0  | 7  | 46,3869 | 46,4323 | -0,0454 | 1,955885 | 1,954078 | 0,00180   |
| 91  | 1 | -2 | 7  | 46,6457 | 46,6557 | -0,0100 | 1,945632 | 1,945240 | 0,000393  |
| 92  | 2 | -4 | -3 | 46,7792 | 46,8089 | -0,0297 | 1,940391 | 1,939230 | 0,00116   |
| 93  | 3 | 0  | 2  | 47,3470 | 47,3220 | 0,0250  | 1,918437 | 1,919391 | -0,0009   |
| 94  | 3 | -3 | -3 | 47,4331 | 47,4386 | -0,0055 | 1,915156 | 1,914947 | 0,00020   |
| 95  | 2 | -2 | 6  | 47,8712 | 47,8499 | 0,0213  | 1,898645 | 1,899440 | -0,000795 |
| 96  | 0 | 1  | -8 | 48,1050 | 48,0438 | 0,0612  | 1,889962 | 1,892228 | -0,002266 |
| 97  | 2 | 2  | 3  | 48,2937 | 48,3433 | -0,0496 | 1,883018 | 1,881202 | 0,00181   |
| 98  | 1 | -3 | -6 | 48,6367 | 48,6851 | -0,0484 | 1,870537 | 1,868792 | 0,00174   |
| 99  | 3 | 1  | -2 | 48,8088 | 48,9039 | -0,0951 | 1,864344 | 1,860939 | 0,00340   |
| 100 | 0 | 4  | -5 | 49,4301 | 49,3928 | 0,0373  | 1,842354 | 1,843657 | -0,0013   |
| 101 | 1 | -1 | -8 | 49,9111 | 49,9053 | 0,0057  | 1,825722 | 1,825918 | -0,000196 |
| 102 | 2 | 3  | -1 | 50,2154 | 50,1914 | 0,0240  | 1,815369 | 1,816181 | -0,00081  |
| 103 | 2 | 1  | -7 | 50,6298 | 50,6421 | -0,0123 | 1,801478 | 1,801068 | 0,00041   |
| 104 | 1 | -5 | -1 | 51,4576 | 51,4191 | 0,0386  | 1,774424 | 1,775664 | -0,001241 |
| 105 | 2 | 2  | 4  | 51,8547 | 51,8540 | 0,0007  | 1,761766 | 1,761790 | -0,000023 |
| 106 | 3 | -1 | -6 | 52,4346 | 52,4082 | 0,0264  | 1,743637 | 1,744453 | -0,000816 |
| 107 | 0 | 4  | -6 | 52,9931 | 53,0158 | -0,0227 | 1,726570 | 1,725885 | 0,000686  |
| 108 | 1 | -5 | -2 | 53,1458 | 53,1778 | -0,0321 | 1,721970 | 1,721007 | 0,00096   |
| 109 | 2 | -1 | -8 | 53,6254 | 53,6209 | 0,0045  | 1,707695 | 1,707828 | -0,00013  |
| 110 | 2 | 1  | 6  | 54,1657 | 54,1804 | -0,0147 | 1,691929 | 1,691504 | 0,000425  |
| 111 | 0 | 0  | 9  | 54,6920 | 54,6401 | 0,0519  | 1,676887 | 1,678356 | -0,001469 |
| 112 | 1 | 0  | -9 | 54,7513 | 54,7883 | -0,0370 | 1,675210 | 1,674165 | 0,001045  |
| 113 | 0 | 3  | -8 | 55,1552 | 55,1688 | -0,0136 | 1,663894 | 1,663515 | 0,000379  |
| 114 | 4 | -2 | -1 | 55,6350 | 55,6388 | -0,0038 | 1,650676 | 1,650571 | 0,000105  |
| 115 | 2 | -4 | 6  | 55,7402 | 55,7600 | -0,0197 | 1,647808 | 1,647271 | 0,000537  |
| 116 | 1 | -4 | -6 | 56,7663 | 56,7528 | 0,0135  | 1,620436 | 1,620789 | -0,00035  |
| 117 | 2 | 3  | 3  | 56,9998 | 57,0050 | -0,0052 | 1,614351 | 1,614215 | 0,000136  |
| 118 | 4 | -2 | -3 | 57,2505 | 57,2660 | -0,0155 | 1,607875 | 1,607477 | 0,000398  |
| 119 | 3 | -5 | -1 | 57,4484 | 57,4285 | 0,0200  | 1,602805 | 1,603315 | -0,000510 |
| 120 | 4 | -1 | -3 | 57,7428 | 57,7583 | -0,0154 | 1,595332 | 1,594942 | 0,000390  |
| 121 | 4 | -1 | 1  | 57,9822 | 57,9113 | 0,0709  | 1,589314 | 1,591091 | -0,001777 |
| 122 | 1 | 4  | -6 | 58,1553 | 58,1343 | 0,0210  | 1,584995 | 1,585517 | -0,000523 |
| 123 | 1 | 3  | 6  | 58,3106 | 58,2962 | 0,0143  | 1,581145 | 1,581499 | -0,000354 |
| 124 | 2 | -5 | -4 | 58,6158 | 58,6260 | -0,0103 | 1,573636 | 1,573385 | 0,000251  |
| 125 | 1 | 0  | 9  | 58,9156 | 58,9223 | -0,0067 | 1,566341 | 1,566180 | 0,00016   |
| 126 | 2 | 0  | -9 | 59,0851 | 59,0768 | 0,0083  | 1,562252 | 1,562451 | -0,000199 |
| 127 | 1 | -3 | -8 | 59,4406 | 59,4386 | 0,0020  | 1,553753 | 1,553801 | -0,000048 |
| 128 | 4 | 0  | -2 | 59,5985 | 59,6069 | -0,0084 | 1,550015 | 1,549816 | 0,000198  |
| 129 | 4 | 0  | 0  | 60,0090 | 60,0511 | -0,0421 | 1,540388 | 1,539409 | 0,000979  |
| 130 | 2 | 2  | 6  | 60,5879 | 60,5716 | 0,0163  | 1,527049 | 1,527420 | -0,000371 |
| 131 | 4 | -2 | 3  | 60,8951 | 60,9048 | -0,0097 | 1,520078 | 1,519861 | 0,000218  |
| 132 | 1 | 5  | 0  | 61,4641 | 61,4653 | -0,0012 | 1,507365 | 1,507338 | 0,000027  |
| 133 | 4 | 0  | -4 | 61,9288 |         |         | 1,497164 |          |           |
| 134 | 3 | 0  | 6  | 61,9476 | 61,9439 | 0,0037  | 1,496754 | 1,496835 | -0,000081 |
| 135 | 2 | -4 | -7 | 62,0927 | 62,0709 | 0,0218  | 1,493605 | 1,494077 | -0,000472 |
| 136 | 1 | -6 | -1 | 62,9045 | 62,8926 | 0,0119  | 1,476269 | 1,476519 | -0,000250 |
| 137 | 1 | 3  | 7  | 63,4123 | 63,3664 | 0,0459  | 1,465664 | 1,466615 | -0,000951 |
| 138 | 3 | 3  | -1 | 63,9275 | 63,9194 | 0,0081  | 1,455089 | 1,455254 | -0,000165 |
| 139 | 3 | -3 | 7  | 64,3401 | 64,3191 | 0,0210  | 1,446750 | 1,447172 | -0,000421 |
| 140 | 4 | 1  | -2 | 64,4883 | 64,4891 | -0,0008 | 1,443783 | 1,443767 | 0,000016  |
| 141 | 1 | -3 | -9 | 65,3799 | 65,3680 | 0,0119  | 1,426235 | 1,426466 | -0,000231 |
| 142 | 0 | 6  | -2 | 65,6332 | 65,6169 | 0,0163  | 1,421343 | 1,421657 | -0,000314 |
| 143 | 1 | -5 | -6 | 66,2762 | 66,2709 | 0,0053  | 1,409104 | 1,409203 | -0,000099 |
| 144 | 3 | -4 | -7 | 66,5021 | 66,5046 | -0,0025 | 1,404863 | 1,404817 | 0,000046  |

|     |   |    |    |         |         |         |          |          |           |
|-----|---|----|----|---------|---------|---------|----------|----------|-----------|
| 145 | 4 | -5 | -2 | 67,1331 | 67,1227 | 0,0104  | 1,393184 | 1,393375 | -0,000191 |
| 146 | 4 | -2 | 5  | 67,3649 | 67,3609 | 0,0041  | 1,388953 | 1,389027 | -0,000074 |
| 147 | 3 | 3  | 2  | 68,0650 | 68,0648 | 0,0002  | 1,376362 | 1,376365 | -0,000003 |
| 148 | 4 | -5 | -3 | 68,5927 | 68,6200 | -0,0274 | 1,367056 | 1,366577 | 0,000479  |

**Electron micrographs for the compressed (BEDT-TTF)<sub>2</sub>I<sub>3</sub> powder used for thermoelectric characterizations**

Aggregates (sizes in the 20-70 nm range) have been observed at low magnification (figure below, bar = 200 nm).

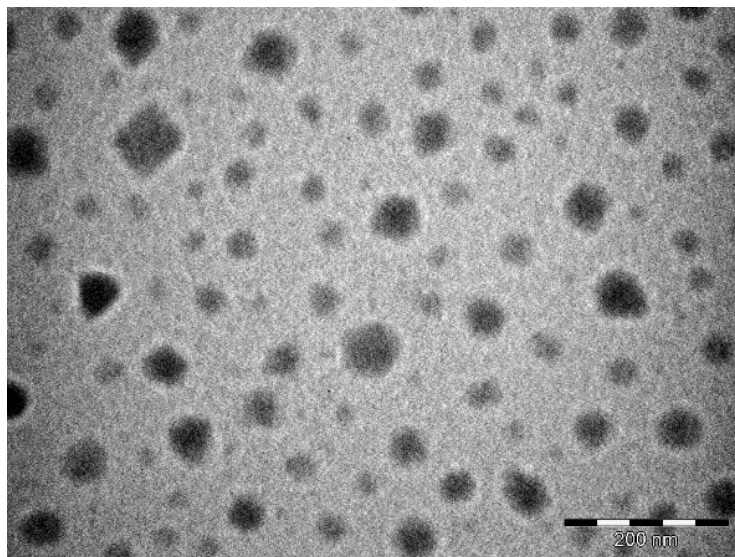

At higher magnification (figure below, bar = 5 nm), it has been evidenced that aggregates are made of small individual particles.

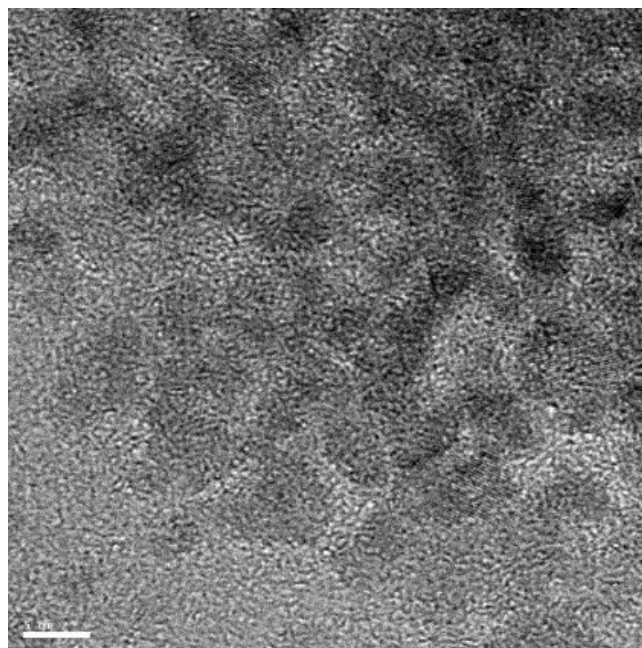

Moreover, as observed for the uncompressed sample, small isolated particles (2-10 nm) are clearly present on the grid (figures below):

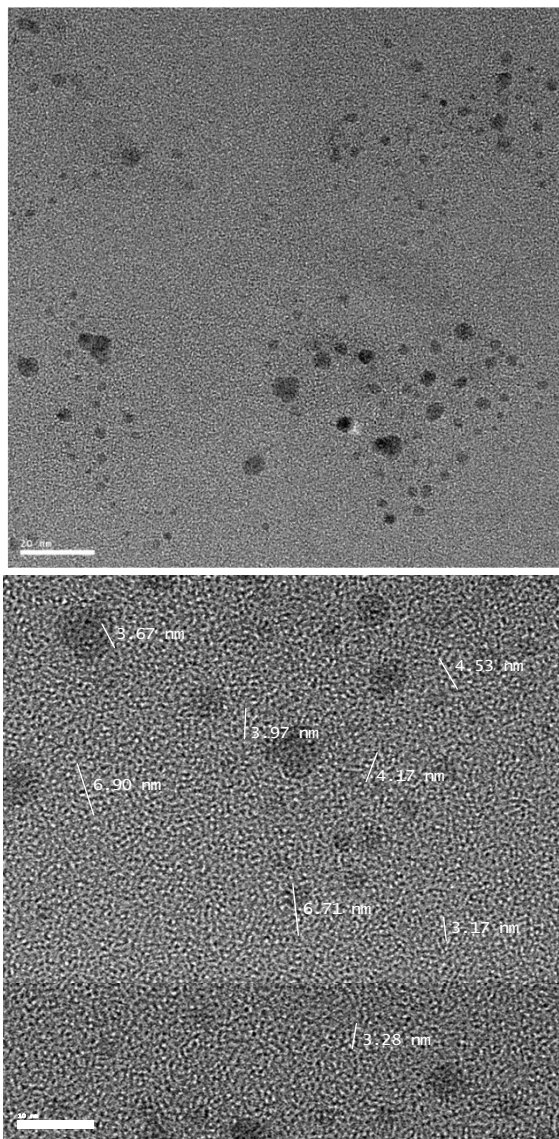

Top: bar = 20 nm; bottom: bar = 10 nm

On individual nanoparticles, crystal planes can be observed (images below, bar = 5 nm for each image).

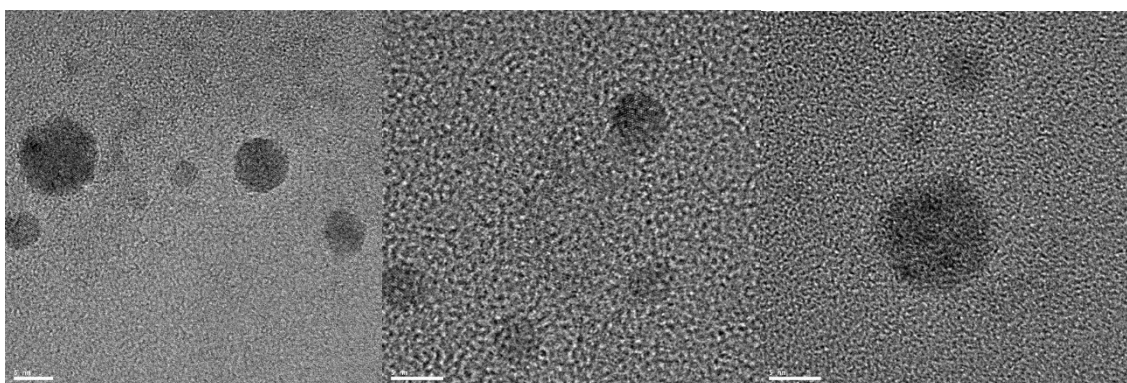

Supplement: c6tc01378c1.pdf [file c6tc01378c1.pdf]
